## Fluoride-induced Diuresis:

### Renal-tissue Solute Concentrations, Functional, Hemodynamic, and Histologic Correlates in the Rat

Gary M. Whitford, Ph.D.,\* Donald R. Taves, M.D., Ph.D.†

Groups of anesthetized rats received graded doses of fluoride in isotonic solutions by continuous, iv infusions. Resultant plasma fluoride concentrations included those known to occur in patients following methoxyflurane anesthesia. Graded increases in urine-flow rate were not accompanied by increases in sodium or potassium excretion or osmolar clearance. In some experiments, sodium or potassium excretions were reduced, as were urinary osmolality and tubular free-water reabsorption. Glomerular filtration rates tended to be reduced in the fluoride-infusion groups, while  $^{125}\text{I}$ -hippuran clearance was not altered. The inner medullary sodium concentration was inversely related to plasma fluoride concentration. Increased renal-tissue water content accounted for a portion of slightly reduced medullary potassium concentrations. Histologically, glomeruli from fluoride-infused rats contained less than half the erythrocytes of control rat glomeruli. Outer medullary vessels appeared hyperemic. These results suggest that the fluoride-induced concentrating defect results from increased medullary blood flow, increased permeability to water, and/or decreased sodium reabsorption, in the ascending limbs of Henle's loops. These findings are consistent with the hypothesis that fluoride is responsible for the concentrating defect following methoxyflurane anesthesia. (Key words: Fluoride; Concentrating defect; Methoxyflurane nephrotoxicity.)

\* Assistant Professor of Oral Biology-Physiology. Present address: Medical College of Georgia, Dept. of Oral Biology, Augusta, Ga. 30902.

† Associate Professor of Pharmacology and Toxicology.

Received from the Department of Radiation Biology and Biophysics and the Department of Pharmacology and Toxicology, University of Rochester School of Medicine and Dentistry, Rochester, New York 14642. Accepted for publication April 20, 1973. This paper is taken from the Ph.D. thesis of Dr. Whitford, "Acute Effects of Inorganic Fluoride on Renal Function in Rats." University of Rochester, 1971. Supported in part by work performed under contract with the U. S. Atomic Energy Project and in part by the USPHS Training Grants 1-P11-GM-15190, GM-01781 and DE-00175, and has been assigned Report No. UR-3490-200.

THE LITERATURE contains references to the effects of inorganic fluoride on both kidney structure<sup>1-4</sup> and kidney function,<sup>2, 4-5</sup> but these effects have not been studied in detail. This lack is probably due to the fact that renal effects are not a prominent feature of fluoride toxicity when fluoride is ingested orally, the usual route of exposure. More information about parenterally administered fluoride is needed in order to evaluate the hypothesis that fluoride released from the anesthetic methoxyflurane,  $\text{CH}_2\text{OCF}_2\text{CHCl}_2$ , is responsible for the high-output renal failure occasionally seen after anesthesia.

Taves *et al.*<sup>3</sup> advanced the hypothesis after finding a much higher plasma fluoride concentration ( $275 \mu\text{M}$ ) in a patient with high-output renal failure than in two other patients who were free of nephrotoxic symptoms ( $<30 \mu\text{M}$ ).<sup>†</sup> Subsequent studies by Fry *et al.*<sup>10</sup> indicated the usual plasma fluoride concentration to be 20-60  $\mu\text{M}$  in both man and rat the day after methoxyflurane anesthesia, while Mazzeo *et al.*<sup>11</sup> reported that maximum values averaging 105 and 190  $\mu\text{M}$  were associated with laboratory and clinical evidence of changes in renal function. There were, however, no data to demonstrate that the plasma fluoride concentrations seen clinically could produce comparable renal effects in animals when other methoxyflurane metabolites<sup>10, 12</sup> were not present. Thus, the hypothesis rested on a tenuous base.

Three recent reports have partially filled this hiatus. Whitford and Taves presented preliminary data<sup>13</sup> from anesthetized rats infused with fluoride indicating that urine-flow rate tripled when plasma fluoride concentration was raised from approximately 1  $\mu\text{M}$  to 300  $\mu\text{M}$ , which is appropriate to the hypothesis. They also suggested that the basis of the diuresis was

† Plasma fluoride concentrations of healthy adults drinking fluoridated water (1 ppm or 52  $\mu\text{M}$ ) are approximately 1  $\mu\text{M}$ .

TABLE 1. Time Courses of Urine-flow Rates ( $\mu\text{l}/\text{min}$ ) for Various Fluoride-infusion Rates\*

|             | Urine-flow Rates ( $\mu\text{l}/\text{min}$ ) |                   |                    |                    |                      |
|-------------|-----------------------------------------------|-------------------|--------------------|--------------------|----------------------|
|             | F, 0                                          | F, 50<br>nmol/min | F, 100<br>nmol/min | F, 500<br>nmol/min | F, 1,000<br>nmol/min |
| 0-30 min    |                                               |                   |                    |                    |                      |
| Mean        | 2.15                                          | 2.16              | 2.10               | 3.45               | 4.31                 |
| SEM         | 0.12                                          | 0.20              | 0.13               | 0.25               | 0.73                 |
| Number      | 37                                            | 10                | 24                 | 41                 | 5                    |
| 30-60 min   |                                               |                   |                    |                    |                      |
| Mean        | 2.44                                          | 2.80              | 2.74               | 4.68               | 5.04                 |
| SEM         | 0.15                                          | 0.26              | 0.18               | 0.30               | 1.42                 |
| Number      | 37                                            | 10                | 24                 | 39                 | 5                    |
| 60-90 min   |                                               |                   |                    |                    |                      |
| Mean        | 2.59                                          | 3.68              | 3.73               | 5.76               | 7.88                 |
| SEM         | 0.11                                          | 0.31              | 0.32               | 0.34               | 2.17                 |
| Number      | 37                                            | 10                | 24                 | 39                 | 5                    |
| 90-120 min  |                                               |                   |                    |                    |                      |
| Mean        | 2.97                                          | 4.17              | 3.94               | 6.71               | 6.93                 |
| SEM         | 0.16                                          | 0.39              | 0.31               | 0.42               | 1.07                 |
| Number      | 37                                            | 10                | 24                 | 38                 | 5                    |
| 120-150 min |                                               |                   |                    |                    |                      |
| Mean        | 3.04                                          | 4.29              | 4.54               | 7.27               | 5.84                 |
| SEM         | 0.14                                          | 0.43              | 0.33               | 0.42               | 0.66                 |
| Number      | 37                                            | 10                | 24                 | 39                 | 5                    |
| 150-180 min |                                               |                   |                    |                    |                      |
| Mean        | 3.10                                          | 4.66              | 4.88               | 7.98               | 5.91                 |
| SEM         | 0.13                                          | 0.39              | 0.41               | 0.58               | 1.30                 |
| Number      | 37                                            | 10                | 24                 | 39                 | 5                    |
| 180-210 min |                                               |                   |                    |                    |                      |
| Mean        | 3.19                                          | 4.77              | 5.23               | 8.75               | 5.31                 |
| SEM         | 0.16                                          | 0.33              | 0.43               | 0.76               | 1.83                 |
| Number      | 35                                            | 10                | 24                 | 35                 | 5                    |
| 210-240 min |                                               |                   |                    |                    |                      |
| Mean        | 2.98                                          | 4.93              | 6.62               | 10.58              | —                    |
| SEM         | 0.41                                          | 0.43              | 0.84               | 1.63               |                      |
| Number      | 7                                             | 9                 | 9                  | 8                  |                      |

\* Infusion of solutions started at zero time.

a reduction in renal inner medullary sodium concentration. Frascino<sup>14</sup> reported that a plasma fluoride concentration of approximately 400  $\mu\text{M}$  in hypotensive dogs resulted in an increase in urine-flow rate, and decreases in urinary osmolality and renal medullary sodium concentration, with little or no change in glomerular filtration rate or sodium excretion rate. Mazze *et al.*<sup>15</sup> noted diuresis (unresponsive to vasopressin), urinary dilution, hemoconcentration, and weight loss in one strain of rats given me-

thoxyflurane or fluoride, with plasma fluoride concentrations ranging to as much as 700  $\mu\text{M}$ .

Additional information is needed concerning the effects of low plasma fluoride concentrations on renal function and the mechanism of action. The present experiments concentrate on plasma fluoride levels of clinical interest and the associated changes in renal-tissue composition, function, hemodynamics, and histology.

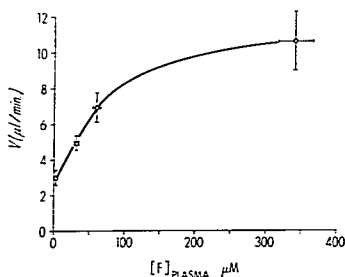

FIG. 1. Urine-flow rates and plasma fluoride concentrations (means  $\pm$  SEM) during the eighth half-hour of fluoride infusion in experiment 2. Left to right: F, 0; F, 50 nmol/min; F, 100 nmol/min; F, 500 nmol/min.

### Methods

Female, 200-g. Sprague-Dawley rats were anesthetized with sodium pentobarbital (40 mg/kg, ip). The basic experiment was to assign four rats randomly to different fluoride-infusion-rate groups. All infusates were isotonic, containing 145 mM sodium and various concentrations of chloride and fluoride. Additional, trace solutes were hydroxymethyl  $^{14}\text{C}$ -inulin and  $^{125}\text{I}$ -hippuran, depending upon the experiment. Solutions were infused continuously at a slow rate (20  $\mu\text{l}/\text{min}$ ) into the left iliac vein.

The urinary bladder was catheterized intra-urethraly with polyethylene tubing. Urine was collected, usually for half-hour periods, by attaching a capillary tube of constant inside diameter and known volume to the catheter. Urine volumes were determined by measuring the urine column. This technique is more rapid than weighing, and the two methods were found to agree to within 0.5 per cent. Blood was collected in heparinized capillary tubes from the severed tail tip at the mid-points of urine-collection periods, or terminally from the tail tip or heart, depending upon the experiment.

In experiments which included analysis of renal tissue, both kidneys were removed simultaneously following the final urine collection. Each kidney was divided along its longitudinal axis. The polar thirds were cut away and discarded. A second longitudinal cut was made

so that a wedge from the center of the kidney remained. This wedge was divided into cortex, outer medulla, inner medulla, and papilla in one experiment, while in two others the inner medulla included the papilla. Corresponding sections from each kidney were pooled for weighing, homogenization, and analysis. Homogenization was done in 0.70 ml of deionized, doubly-distilled water. The facing kidney half was similarly sectioned except for the papilla, then weighed, dried to constant weight in a 70-C oven and reweighed to determine water content. All renal-tissue analyses are expressed in terms of water content. In one experiment kidney sections were stained with hematoxylin and eosin and prepared for microscopic examination.

Sodium and potassium were determined by flame photometry, osmolality by freezing-point depression, and fluoride by electrode, as previously reported,<sup>13</sup> or with a modification of the Morin-thorium method of Taves<sup>14</sup> following fluoride isolation by hexamethyldisiloxane diffusion. Urinary pH was determined with narrow-range pH paper and systemic hematocrit by microanalytic technique; these values were not influenced by fluoride infusion. Hydroxymethyl  $^{14}\text{C}$ -inulin<sup>15</sup> was determined by liquid scintillation. To obtain similar quenching, 100  $\mu\text{l}$  of cold rat plasma from a common pool were added to each urine, standard, and background sample.  $^{125}\text{I}$ -hippuran was counted in a well-type scintillation counter.

### EXPERIMENT 1

Urine-flow rates and plasma fluoride concentrations from this experiment have been reported.<sup>13</sup> Fluoride-infusion-rate groups received 0 (isotonic saline solution), 100, 500, and 1,000 nanomoles/min. The saline-solution group had four rats and each of the others had five rats. Urine collections continued for 3½ hours, and then the kidneys were removed. The renal papilla was analyzed separately from the inner medulla.

### EXPERIMENT 2

Fluoride-infusion groups received F(0), F(50), F(100), and F(500). These groups

§ Infusion-rate groups are designated by F followed by the nanomoles/min in parenthesis, e.g., F(100) means 100 nanomoles/min of fluoride were infused.

Downloaded from http://ajph.aphspubs.org/ at guest on 19 April 2024

TABLE 2. Sodium, Potassium, and Fluoride Concentrations in Kidney Sections (Means  $\pm$  SEM)\*

|                                    | Na (mM) |                    |                    |                    |                    |       | K (mM) |                   |                   |                   |      |       | F ( $\mu$ M) |        |          |                    |                    |        |                   |          |
|------------------------------------|---------|--------------------|--------------------|--------------------|--------------------|-------|--------|-------------------|-------------------|-------------------|------|-------|--------------|--------|----------|--------------------|--------------------|--------|-------------------|----------|
|                                    | F, 0    | F, 50              | F, 100             | F, 500             | F, 1,000           | F, 0  | F, 50  | F, 100            | F, 500            | F, 1,000          | F, 0 | F, 50 | F, 100       | F, 500 | F, 1,000 | F, 0               | F, 50              | F, 100 | F, 500            | F, 1,000 |
| Experiment 1<br>Cortex             | 66.2    | —                  | 74.0 <sup>b</sup>  | 68.2               | 71.5               | 108.2 | —      | 95.2 <sup>a</sup> | 80.0 <sup>c</sup> | 83.8 <sup>b</sup> | —    | —     | 189          | 1008   | 1,612    | 66.2               | —                  | 189    | 1008              | 1,612    |
|                                    | 2.0     | —                  | 2.4                | 3.1                | 3.5                | 2.5   | —      | 2.0               | 1.0               | 4.1               | —    | —     | 10           | 11     | 320      | 2.0                | —                  | 10     | 11                | 320      |
| Outer medulla                      | 88.5    | —                  | 102.5 <sup>a</sup> | 81.7               | 78.8               | 90.3  | —      | 85.2 <sup>b</sup> | 78.2 <sup>c</sup> | 78.3 <sup>b</sup> | —    | —     | 300          | 1,284  | 2,056    | 88.5               | —                  | 300    | 1,284             | 2,056    |
|                                    | 3.1     | —                  | 4.0                | 5.9                | 4.3                | 1.0   | —      | 2.0               | 2.0               | 3.0               | —    | —     | 56           | 79     | 305      | 3.1                | —                  | 56     | 79                | 305      |
| Inner medulla                      | 204.3   | —                  | 141.8 <sup>b</sup> | 114.5 <sup>b</sup> | 102.1 <sup>c</sup> | 73.9  | —      | 60.0 <sup>c</sup> | 61.8 <sup>c</sup> | 60.5 <sup>a</sup> | —    | —     | 300          | 1,812  | 2,783    | 204.3              | —                  | 300    | 1,812             | 2,783    |
|                                    | 15.2    | —                  | 7.8                | 9.0                | 2.9                | 1.2   | —      | 2.0               | 1.0               | 2.5               | —    | —     | 41           | 125    | 472      | 15.2               | —                  | 41     | 125               | 472      |
| Papilla                            | 309.1   | —                  | 191.4 <sup>c</sup> | 133.3 <sup>c</sup> | 110.2 <sup>c</sup> | 91.4  | —      | 72.0 <sup>c</sup> | 70.0 <sup>c</sup> | 57.3 <sup>c</sup> | —    | —     | 720          | 2,465  | 5,836    | 309.1              | —                  | 720    | 2,465             | 5,836    |
|                                    | 17.2    | —                  | 11.1               | 9.0                | 9.3                | 1.5   | —      | 1.1               | 2.1               | 2.5               | —    | —     | 130          | 42     | 961      | 17.2               | —                  | 130    | 42                | 961      |
| Experiment 2<br>Cortex             | 70.0    | 81.8               | 90.8               | 75.4               | —                  | 60.2  | 102.5  | 90.5              | 85.3 <sup>b</sup> | —                 | —    | 192   | 850          | —      | 70.0     | 81.8               | 90.8               | 90.5   | 85.3 <sup>b</sup> | —        |
|                                    | 1.2     | 3.0                | 2.5                | 2.2                | —                  | 3.0   | 3.0    | 3.0               | 3.3               | —                 | —    | 0     | 105          | —      | 1.2      | 3.0                | 2.5                | 3.0    | 3.3               | —        |
| Inner medulla<br>including papilla | 210.2   | 140.2 <sup>c</sup> | 117.2 <sup>c</sup> | 87.4 <sup>c</sup>  | —                  | 61.7  | 60.0   | 58.8              | 50.4 <sup>a</sup> | —                 | —    | 231   | 1,373        | —      | 210.2    | 140.2 <sup>c</sup> | 117.2 <sup>c</sup> | 60.0   | 50.4 <sup>a</sup> | —        |
|                                    | 7.8     | 11.1               | 5.7                | 2.1                | —                  | 1.3   | 2.2    | 2.0               | 1.8               | —                 | —    | 35    | 309          | —      | 7.8      | 11.1               | 5.7                | 35     | 309               | —        |

\* Values are means  $\pm$  SEM. Values in parentheses are means  $\pm$  SEM for the corresponding control group. Values are significantly different from control values ( $p < 0.05$ ) by Student's *t*-test.

TABLE 3. Per Cent Water Content (Means  $\pm$  SEM) of Renal Tissue Sections\*

|                                     | Per Cent Water |                   |                          |                          |                          |
|-------------------------------------|----------------|-------------------|--------------------------|--------------------------|--------------------------|
|                                     | F. 0           | F. 50<br>nmol/min | F. 100<br>nmol/min       | F. 500<br>nmol/min       | F. 1,000<br>nmol/min     |
| Experiment 1                        |                |                   |                          |                          |                          |
| Cortex                              | 74.6<br>0.5    | —                 | 76.9 <sup>b</sup><br>1.0 | 78.5 <sup>c</sup><br>0.8 | 79.0 <sup>c</sup><br>0.7 |
| Outer medulla                       | 78.4<br>0.5    | —                 | 81.3 <sup>c</sup><br>0.9 | 81.1 <sup>c</sup><br>1.2 | 81.9 <sup>c</sup><br>1.0 |
| Inner medulla                       | 81.8<br>2.5    | —                 | 86.6<br>2.5              | 87.9 <sup>b</sup><br>0.9 | 88.3 <sup>b</sup><br>0.9 |
| Papilla                             | 84.8<br>2.5    | —                 | 87.6<br>2.5              | 88.9 <sup>b</sup><br>0.9 | 89.3 <sup>b</sup><br>0.9 |
| Experiment 2                        |                |                   |                          |                          |                          |
| Cortex                              | 76.1<br>0.5    | 75.3<br>0.3       | 76.7<br>0.4              | 79.2 <sup>b</sup><br>0.6 | —                        |
| Inner medulla,<br>including papilla | 84.6<br>0.5    | 85.3<br>0.4       | 86.8 <sup>b</sup><br>0.3 | 88.3 <sup>c</sup><br>0.3 | —                        |

\* Infusion of solutions started at zero time.

<sup>a</sup>b,c:  $P < 0.05$ ,  $P < .01$ ,  $P < 0.001$ , respectively, compared with F, 0.

had eight, ten, ten, and ten rats, respectively. Urine collections were begun one hour before starting infusions and then continued for eight half-hour periods. The kidneys were removed during the ninth half hour of infusion. A single, terminal blood sample was taken. The renal papilla was included with the inner medulla.

#### EXPERIMENT 3

Fluoride infusion rates were F(0) ( $n = 6$ ) and F(100) ( $n = 9$ ). An intravenous priming dose of hydroxymethyl <sup>14</sup>C-inulin (0.25  $\mu$ Ci in 0.20 ml isotonic saline solution) was given shortly after starting the sustaining infusion. Blood was collected during the third, fifth, sixth, and seventh half-hour urine collection periods.

#### EXPERIMENT 4

Fluoride-infusion-rate groups were F(0) ( $n = 9$ ) and F(500) ( $n = 11$ ). Otherwise this experiment was identical to experiment 3.

#### EXPERIMENT 5

Fluoride-infusion-rate groups were F(0) ( $n = 8$ ) and F(450) ( $n = 11$ ). An intravenous priming dose of <sup>131</sup>I-hippuran, in 0.10 ml isotonic saline solution, was given immedi-

ately after starting the sustaining infusion. Resultant plasma <sup>131</sup>I counts were at least five times background in 100- $\mu$ l samples. Blood was collected as in experiment 3.

#### EXPERIMENT 6

This experiment involved three rats receiving F(100) and was designed to observe the time course of the reduction of inner medullary sodium concentration. Urine was collected in 15-minute intervals and single blood samples were taken from the tail tips terminally. Kidneys were removed 40, 70, and 100 minutes after the start of infusion. The inner medulla included the papilla.

#### EXPERIMENT 7

Five rats were used, two receiving F(0) and three receiving F(500) for six half-hour urine collections. Kidneys were then removed and prepared for sectioning and staining with hematoxylin and eosin. Glomerular erythrocyte numbers were counted. A glomerulus was included for cell counting only if it had been sectioned through its center, as judged by its area. Ten outer cortical glomeruli and ten inner cortical glomeruli from each rat were counted.

Student's *t* test for differences between control and fluoride-infused means was used for statistical analysis.

### Results

#### URINE-FLOW RATE AND PLASMA FLUORIDE CONCENTRATION

Table 1 summarizes all urine-flow-rate data from experiments 1, 2, 3, 4, 5, and 7. Elevation of the mean urine-flow rates of the fluoride-infused groups attained statistical significance ( $P < 0.001$ ) after the second half hour of infusion. This effect was found in all experiments except experiment 3, where urine flow rates for the F(100) group were lower than the control values for the first two half-hour collections. Subsequently, they became higher than control urine-flow rates, but not with statistical significance. The terminal, mean plasma fluoride concentration of the F(100) group was  $78 \mu\text{M}$ . The F(1,000) group of experiment 1 showed a decline in urine-flow rates after the third collection, when the mean plasma fluoride concentration was about  $500 \mu\text{M}$ .

Figure 1 plots the eighth half-hour urine-flow rate and corresponding plasma fluoride concentration for each infusion-rate group of experiment 2. The fluoride concentration of the F(0) group was not precisely determined but was less than  $2 \mu\text{M}$ . The F(50) group had a mean fluoride concentration of  $32 \mu\text{M}$  and a 64 per cent increase ( $P < 0.01$ ) in urine-flow rate over the F(0) group. The F(100) and F(500) groups had plasma fluoride concentrations of 61 and  $341 \mu\text{M}$ , respectively. Their increases in urine-flow rate over the F(0) group were 121 and 253 per cent, respectively ( $P < 0.001$ ).

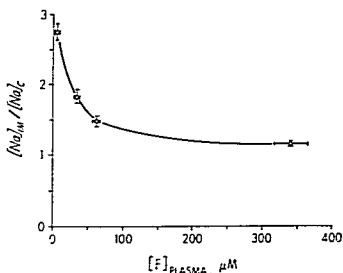

FIG. 2. Inner medullary/cortical sodium concentrations and plasma fluoride concentrations (mean  $\pm$  SEM) during the ninth half-hour of fluoride infusion in experiment 2. Left to right: F, 0; F, 50 nmol/min; F, 100 nmol/min; F, 500 nmol/min.

#### RENAL-TISSUE SODIUM, POTASSIUM, AND FLUORIDE CONCENTRATIONS

Table 2 shows the sodium, potassium, and fluoride concentrations in various renal sections for all rats of experiments and 1 and 2. The sodium concentrations of the inner medulla and papilla were inversely related to the fluoride concentrations. The potassium concentrations for all renal sections of the fluoride groups were generally reduced. A portion of this effect can be explained by increased water content (table 3). The renal fluoride concentrations, not determined for the F(0) group, ranged from  $92 \mu\text{M}$  in the cortex of the F(50) group to  $5.8 \text{ mM}$  in the papilla of the F(1,000) group. A three- to fourfold concentration gradient (papilla/cortex) was present for fluoride.

Figure 2 shows the sodium concentration gradient (inner medulla/cortex) as a function of plasma fluoride concentration in experiment

TABLE 4. Experiment 6,\* Time Courses of Reductions of Inner Medullary Sodium Concentration, Terminal Urine-flow Rate ( $\dot{V}$ ), and Plasma Fluoride Concentration ( $[F]_P$ )

|                                | Minutes of Infusion | $\dot{V}$ ( $\mu\text{l}/\text{min}$ ) | Na (mM) |               | $[F]_P$ ( $\mu\text{M}$ ) |
|--------------------------------|---------------------|----------------------------------------|---------|---------------|---------------------------|
|                                |                     |                                        | Cortex  | Inner medulla |                           |
| Control data from experiment 2 | 240                 | 3.0                                    | 79.6    | 216.2         | —                         |
| Rat 1                          | 40                  | 3.6                                    | 101.8   | 241.9         | 18                        |
| Rat 2                          | 70                  | 9.3                                    | 87.8    | 157.2         | 34                        |
| Rat 3                          | 100                 | 13.5                                   | 91.1    | 153.5         | —                         |

\* Rats 1, 2, and 3 received 100 nanomoles fluoride/min.

TABLE 5. Experiment 2, Sodium and Potassium Excretion Rates (Means  $\pm$  SEM)\*

|             | F, 0                  |                      | F, 50 nmol/min        |                      | F, 100 nmol/min       |                      | F, 500 nmol/min       |                      |
|-------------|-----------------------|----------------------|-----------------------|----------------------|-----------------------|----------------------|-----------------------|----------------------|
|             | Na Excretion (nM/min) | K Excretion (nM/min) | Na Excretion (nM/min) | K Excretion (nM/min) | Na Excretion (nM/min) | K Excretion (nM/min) | Na Excretion (nM/min) | K Excretion (nM/min) |
| -60-0 min   | 187<br>16             | 484<br>40            | 268*<br>26            | 546<br>35            | 257<br>32             | 504<br>29            | 311*<br>44            | 565<br>43            |
| 60-90 min   | 285<br>41             | 816<br>76            | 434<br>83             | 954<br>95            | 239<br>29             | 726<br>65            | 270<br>28             | 798<br>103           |
| 120-150 min | 390<br>63             | 972<br>70            | 520<br>136            | 928<br>74            | 303<br>32             | 912<br>70            | 430<br>43             | 801<br>84            |
| 210-240 min | 472<br>67             | 842<br>113           | 668<br>125            | 894<br>73            | 574<br>90             | 949<br>92            | 625<br>144            | 743<br>124           |

\* Infusion of solution started at zero time.

\*  $P < 0.05$ .

2. The gradient reduction was statistically significant ( $P < 0.001$ ) even for the F(50) group, whose terminal plasma fluoride concentration was  $32 \mu\text{M}$ .

Table 4 contains data from experiment 6. Control data were from experiment 2 since the experiments were similar and the kidneys were sectioned identically. There was no reduction of inner medullary sodium concentration for the rat sacrificed at 40 minutes. The corresponding plasma fluoride concentration was  $18 \mu\text{M}$  and the terminal urine-flow rate was not elevated. The fluoride effect was clearly present, however, in the rats sacrificed at 70 and 100 minutes. The plasma fluoride concentration of the 70-minute rat was  $34 \mu\text{M}$ . Based on previous experimental results, the plasma fluoride concentration of the 100-minute rat would have been  $40\text{--}50 \mu\text{M}$ . The terminal urine-flow rates of these two rats were elevated.

#### SOLUTE EXCRETION RATE

Preliminary experiments, not detailed here, indicated that sodium and potassium excretion rates of rats receiving F(200) and F(1,000) were approximately half those of rats receiving F(0). Table 5 shows the sodium and potassium excretion rates of experiment 2. These were essentially identical for all groups except during the pre-infusion period, when the excretion rates for the fluoride-infusion groups were, by chance, higher than that for the F(0) group.

Table 6 shows the sodium and potassium excretion rates, expressed in terms of 1 ml/min of glomerular filtration rate, from experiments 3 and 4. The observed sodium excretion rates of the fluoride-infusion groups were lower by approximately half relative to the control groups in both experiments. Potassium excretion rates were also lower, but to a lesser degree. Correction of these excretion rates to units of glomerular filtration rate eliminated the differences in experiment 4 but not in experiment 3.

The influence of fluoride infusion on urinary osmolality is shown in table 7. During the pre-infusion period, urinary osmolalities were similar for all groups (approximately 2,000 mOsm). During the third period, the F(0) group's urinary osmolality increased slightly with little change thereafter. However, in each of the fluoride-infusion groups, urinary osmolality showed a consistent, nearly linear decline with time. The degree of reduction in a given period is directly related to the fluoride-infusion rate. The lowest mean urinary osmolality, 580 mOsm, occurred in the eighth period for the F(500) group. Mean plasma osmolality was 299 mOsm for each group.

The osmolal clearances of the F(0) and F(50) groups approximately doubled after starting infusion. Tubular free-water reabsorption for these two groups increased by a factor of 2 (slightly less in the F(50) group). Osmolal clearance of the F(100) group in-

TABLE 6. Experiments 3 and 4. Observed and GFR-corrected\* Sodium and Potassium Excretion Rates (Means  $\pm$  SEM)

|                                        | F, 0                 |                     |                        |                 |                   |                   | F, 100 nmol/min      |                     |                        |                 |                   |                   | F, 600 nmol/min      |                     |                        |                 |                   |                   |
|----------------------------------------|----------------------|---------------------|------------------------|-----------------|-------------------|-------------------|----------------------|---------------------|------------------------|-----------------|-------------------|-------------------|----------------------|---------------------|------------------------|-----------------|-------------------|-------------------|
|                                        | $N_{Na}$<br>(nM/min) | $N_{K}$<br>(nM/min) | $N_{Na}^c$<br>(nM/min) | $K$<br>(nM/min) | $K^c$<br>(nM/min) | $K^d$<br>(nM/min) | $N_{Na}$<br>(nM/min) | $N_{K}$<br>(nM/min) | $N_{Na}^c$<br>(nM/min) | $K$<br>(nM/min) | $K^c$<br>(nM/min) | $K^d$<br>(nM/min) | $N_{Na}$<br>(nM/min) | $N_{K}$<br>(nM/min) | $N_{Na}^c$<br>(nM/min) | $K$<br>(nM/min) | $K^c$<br>(nM/min) | $K^d$<br>(nM/min) |
| Experiment 3<br>min 00-00<br>min 00-01 | 113                  | 48                  | 242                    | 637             | 483               | 483               | 155                  | 110                 | 654                    | 400             | 400               | —                 | —                    | —                   | —                      | —               | —                 | —                 |
|                                        | 98                   | 72                  | 72                     | 105             | 74                | 74                | 22                   | 49                  | 58                     | 45              | 45                | —                 | —                    | —                   | —                      | —               | —                 | —                 |
| min 01-01<br>min 01-02                 | 112                  | 112                 | 368                    | 830             | 609               | 609               | 227                  | 184                 | 757                    | 610             | 610               | —                 | —                    | —                   | —                      | —               | —                 | —                 |
|                                        | 105                  | 125                 | 125                    | 102             | 44                | 44                | 27                   | 22                  | 42                     | 28              | 28                | —                 | —                    | —                   | —                      | —               | —                 | —                 |
| min 02-08<br>min 02-09                 | 135                  | 130                 | 239                    | 920             | 609               | 609               | 290                  | 251                 | 710                    | 606             | 606               | —                 | —                    | —                   | —                      | —               | —                 | —                 |
|                                        | 130                  | 140                 | 122                    | 140             | 50                | 50                | 22                   | 23                  | 66                     | 48              | 48                | —                 | —                    | —                   | —                      | —               | —                 | —                 |
| All of the above                       | 184                  | 100                 | 346                    | 808             | 573               | 573               | 216*                 | 170*                | 707                    | 506             | 506               | —                 | —                    | —                   | —                      | —               | —                 | —                 |
|                                        | 100                  | 100                 | 62                     | 71              | 33                | 33                | 18                   | 16                  | 31                     | 25              | 25                | —                 | —                    | —                   | —                      | —               | —                 | —                 |
| Experiment 4<br>min 00-00<br>min 00-01 | 520                  | 18                  | 240                    | 619             | 62                | 62                | —                    | —                   | —                      | —               | —                 | —                 | —                    | —                   | —                      | —               | —                 | —                 |
|                                        | 18                   | 48                  | 48                     | 441             | 44                | 44                | —                    | —                   | —                      | —               | —                 | —                 | —                    | —                   | —                      | —               | —                 | —                 |
| min 01-01<br>min 01-02                 | 888                  | 74                  | 221                    | 808             | 559               | 559               | —                    | —                   | —                      | —               | —                 | —                 | —                    | —                   | —                      | —               | —                 | —                 |
|                                        | 888                  | 88                  | 23                     | 83              | 44                | 44                | —                    | —                   | —                      | —               | —                 | —                 | —                    | —                   | —                      | —               | —                 | —                 |
| min 02-08<br>min 02-09                 | 49                   | 169                 | 397                    | 965             | 575               | 575               | —                    | —                   | —                      | —               | —                 | —                 | —                    | —                   | —                      | —               | —                 | —                 |
|                                        | 49                   | 169                 | 48                     | 121             | 38                | 38                | —                    | —                   | —                      | —               | —                 | —                 | —                    | —                   | —                      | —               | —                 | —                 |
| min 03-00<br>min 03-01                 | 384                  | 43                  | 253                    | 906             | 589               | 589               | —                    | —                   | —                      | —               | —                 | —                 | —                    | —                   | —                      | —               | —                 | —                 |
|                                        | 384                  | 43                  | 22                     | 66              | 28                | 28                | —                    | —                   | —                      | —               | —                 | —                 | —                    | —                   | —                      | —               | —                 | —                 |
| min 04-00<br>min 04-01                 | 40                   | 169                 | 397                    | 965             | 575               | 575               | —                    | —                   | —                      | —               | —                 | —                 | —                    | —                   | —                      | —               | —                 | —                 |
|                                        | 40                   | 169                 | 48                     | 121             | 38                | 38                | —                    | —                   | —                      | —               | —                 | —                 | —                    | —                   | —                      | —               | —                 | —                 |
| min 05-00<br>min 05-01                 | 40                   | 169                 | 397                    | 965             | 575               | 575               | —                    | —                   | —                      | —               | —                 | —                 | —                    | —                   | —                      | —               | —                 | —                 |
|                                        | 40                   | 169                 | 48                     | 121             | 38                | 38                | —                    | —                   | —                      | —               | —                 | —                 | —                    | —                   | —                      | —               | —                 | —                 |
| min 06-00<br>min 06-01                 | 40                   | 169                 | 397                    | 965             | 575               | 575               | —                    | —                   | —                      | —               | —                 | —                 | —                    | —                   | —                      | —               | —                 | —                 |
|                                        | 40                   | 169                 | 48                     | 121             | 38                | 38                | —                    | —                   | —                      | —               | —                 | —                 | —                    | —                   | —                      | —               | —                 | —                 |
| min 07-00<br>min 07-01                 | 40                   | 169                 | 397                    | 965             | 575               | 575               | —                    | —                   | —                      | —               | —                 | —                 | —                    | —                   | —                      | —               | —                 | —                 |
|                                        | 40                   | 169                 | 48                     | 121             | 38                | 38                | —                    | —                   | —                      | —               | —                 | —                 | —                    | —                   | —                      | —               | —                 | —                 |
| min 08-00<br>min 08-01                 | 40                   | 169                 | 397                    | 965             | 575               | 575               | —                    | —                   | —                      | —               | —                 | —                 | —                    | —                   | —                      | —               | —                 | —                 |
|                                        | 40                   | 169                 | 48                     | 121             | 38                | 38                | —                    | —                   | —                      | —               | —                 | —                 | —                    | —                   | —                      | —               | —                 | —                 |
| min 09-00<br>min 09-01                 | 40                   | 169                 | 397                    | 965             | 575               | 575               | —                    | —                   | —                      | —               | —                 | —                 | —                    | —                   | —                      | —               | —                 | —                 |
|                                        | 40                   | 169                 | 48                     | 121             | 38                | 38                | —                    | —                   | —                      | —               | —                 | —                 | —                    | —                   | —                      | —               | —                 | —                 |
| min 10-00<br>min 10-01                 | 40                   | 169                 | 397                    | 965             | 575               | 575               | —                    | —                   | —                      | —               | —                 | —                 | —                    | —                   | —                      | —               | —                 | —                 |
|                                        | 40                   | 169                 | 48                     | 121             | 38                | 38                | —                    | —                   | —                      | —               | —                 | —                 | —                    | —                   | —                      | —               | —                 | —                 |

\*  $N_{Na}$ ,  $N_{K}$ ,  $N_{Na}^c$ ,  $K$ ,  $K^c$ ,  $K^d$ , respectively, observed, GFR-corrected, and GFR-corrected excretion rates of sodium, potassium, and potassium, respectively, at zero time.



TABLE 7. Experiment 2. Urinary Osmolalities (Means  $\pm$  SEM)\*

|             | Osmolality (mOsm/kg) |                   |                    |                    |
|-------------|----------------------|-------------------|--------------------|--------------------|
|             | F. 0                 | F. 50<br>nmol/min | F. 100<br>nmol/min | F. 500<br>nmol/min |
| -60-0 min   | 1,913<br>76          | 2,077<br>88       | 1,934<br>90        | 2,043<br>59        |
| 60-90 min   | 2,087<br>111         | 1,813<br>103      | 1,505<br>85        | 930<br>71          |
| 120-150 min | 2,076<br>78          | 1,684<br>125      | 1,243<br>53        | 707<br>60          |
| 210-240 min | 2,072<br>120         | 1,517<br>72       | 971<br>63          | 580<br>46          |

\* Infusion of solutions started at zero time.

creased by about 75 per cent after the start of infusion, while the mean increase in tubular free-water reabsorption was by a factor of 1.5. The osmolal clearance of the F(500) group showed only a slight increase after the start of infusion, and tubular free-water reabsorption decreased progressively from a pre-infusion value of 12.3 to a final value of 5.0  $\mu$ l/min.

#### GLOMERULAR FILTRATION RATE AND <sup>125</sup>I-HIPPURAN CLEARANCE

Table 8 contains glomerular-filtration-rate data from experiments 3 and 4, and <sup>125</sup>I-hippuran clearance data from experiment 5. The glomerular filtration rates of the fluoride-infusion groups, but not those of the control groups, decreased significantly during the experiments. By the end of the experiments, glomerular filtration rates were 80 and 50 per cent of control values in the F(100) and F(500) groups, respectively. Data from experiment 5 indicated that F(450) infusion for 3½ hours had essentially no effect on <sup>125</sup>I-hippuran clearance. Although there was a slight reduction over time, the differences between group means did not achieve statistical significance.

#### MICROSCOPIC APPEARANCE OF THE KIDNEY

Experiment 7 included microscopic examination of kidney sections from rats which had received F(0) and F(500) for three hours. There was no evidence of cellular damage in any section. However, the glomeruli of the sections from the F(500) group contained fewer than half the quantity of erythrocytes

found in the glomeruli of the F(0) group. This was true for both superficial cortical glomeruli ( $49.5 \pm 3.1$  vs.  $22.7 \pm 2.5$  SE) and juxtamedullary glomeruli ( $31.3 \pm 2.2$  vs.  $12.0 \pm 1.2$ ). The vessels of the outer medulla of the F(500) group, on the other hand, appeared hyperemic relative to those of the F(0) group. In the F(500) group there was also slight, but consistent, dilatation of the distal tubules in the cortex and intermediate juxtamedullary zone.

#### Discussion

The renal response of the normally hydrated rat to continuously elevated fluoride concentrations is consistent with the hypothesis that fluoride is responsible for the nephrotoxicity observed in patients after methoxyflurane anesthesia. A three- to fourfold increase in urine flow rate with plasma fluoride concentration of 200–300  $\mu$ M has been observed in man<sup>18</sup> and the rat. A statistically significant increase ( $P < 0.01$ ) in urine-flow rate of 64 per cent occurred in rats when the plasma fluoride concentration was only 32  $\mu$ M. The absence of increased solute excretion to accompany increased urine-flow rate, and the consequent reduction in urinary osmolality, are also similar for man<sup>18,19</sup> and the rat. The results suggest a concentrating defect and are in agreement with the findings of Frascino in dogs<sup>14</sup> and Mazze *et al.*<sup>15</sup> in rats.

The most striking and consistent effect of fluoride, and the likely cause of the concentrating defect, was the reduction of the inner medullary sodium concentration. The data from experiments 2 and 6 indicate that a significant reduction occurs when plasma fluoride concentration is as low as 32  $\mu$ M.

The mechanism whereby fluoride reduces the inner medullary sodium concentration cannot be precisely determined, but certain possibilities can be excluded. There are five possible mechanisms: 1) increased tubular fluid flow rate<sup>20,21,22</sup>; 2) delivery of inadequate quantities of sodium to Henle's loops; 3) inhibition of sodium pumping from the ascending limbs of Henle's loops; 4) increased permeability to water of the ascending limbs of Henle's loops; 5) increased medullary blood flow.

It is doubtful that the first factor is important. Urine-flow rates usually did not ex-

Downloaded from https://academic.oup.com/ajph/article-pdf/39/4/422/923884/0000542-197310000-00016.pdf by guest on 19 April 2024

TABLE 8. Time Courses of Glomerular Filtration Rate and <sup>125</sup>I-hippuran Clearance (ERPF) (Means ± SEM)\*

|                  | Experiment 3<br>GFR (ml/min) |                           | Experiment 4<br>GFR (ml/min) |                           | Experiment 5<br>ERPF (ml/min) |                    |
|------------------|------------------------------|---------------------------|------------------------------|---------------------------|-------------------------------|--------------------|
|                  | F. 0                         | F. 100<br>nmol/min        | F. 0                         | F. 500<br>nmol/min        | F. 0                          | F. 450<br>nmol/min |
| 60-90 min        | 1.31<br>0.07                 | 1.32<br>0.03              | 1.74<br>0.11                 | 1.15 <sup>c</sup><br>0.10 | 2.74<br>0.15                  | 2.81<br>0.34       |
| 120-150 min      | 1.34<br>0.12                 | 1.24<br>0.08              | 1.82<br>0.10                 | 0.90 <sup>c</sup><br>0.09 | 2.37<br>0.19                  | 2.10<br>0.10       |
| 150-180 min      | 1.45<br>0.08                 | 1.15 <sup>a</sup><br>0.07 | 1.66<br>0.08                 | 0.92 <sup>c</sup><br>0.10 | 2.11<br>0.09                  | 1.99<br>0.17       |
| 180-210 min      | 1.49<br>0.10                 | 1.19 <sup>a</sup><br>0.04 | 1.63<br>0.11                 | 0.85 <sup>c</sup><br>0.09 | 2.42<br>0.22                  | 2.10<br>0.17       |
| All of the above | 1.40<br>0.05                 | 1.22 <sup>b</sup><br>0.02 | 1.71<br>0.05                 | 0.96 <sup>c</sup><br>0.05 | 2.41<br>0.09                  | 2.23<br>0.11       |

\* Infusion of solutions started at zero time.

<sup>a-b-c</sup>:  $P < 0.05$ ,  $P < 0.01$ ,  $P < 0.001$ , respectively, compared with F, 0.

ceed 12  $\mu$ l/min, glomerular filtration rates tended to be reduced, and net sodium reabsorption was not inhibited. Atherton *et al.*<sup>21, 22</sup> observed marked changes in medullary solute concentrations during diuresis in rats, but urine-flow rates were well in excess of 100  $\mu$ l/min.

Although a reduction of nearly half in glomerular filtration rate (table 8) might diminish the inner medullary sodium concentration, data from the other fluoride groups indicate that this is not the primary mechanism. During the third half hour of infusion at F(100), the reduction in glomerular filtration rate was only 7 per cent. In experiment 6, after 70 minutes of F(100) infusion, the inner medullary sodium concentration was definitely reduced. Moreover, it would be expected that F(50) would have even less effect on glomerular filtration rate, but this fluoride-infusion rate produced a statistically significant reduction in the inner medullary sodium concentration.

The failure of fluoride to promote increased sodium excretion suggests that sodium reabsorption from the ascending limbs of Henle's loops may not have been markedly reduced. However, inhibition of sodium reabsorption by the proximal tubule and the loop of Henle without increased sodium excretion, indicating increased reabsorption in more distal segments, has been demonstrated.<sup>23, 24</sup> Thus, decreased sodium reabsorption cannot be excluded.

The absence of increased sodium excretion is noteworthy. Yoshida *et al.*<sup>25</sup> demonstrated a 60 per cent *in-vitro* inhibition of Na-K-ATPase in the presence of 0.6 mM fluoride which is one tenth the maximum papillary and less than the maximum cortical, fluoride concentration observed here. Martinez-Maldonado *et al.*<sup>26</sup> unilaterally infused digoxin, a potent inhibitor of Na-K-ATPase, into the renal artery of the dog. A profound, unilateral natriuresis and markedly increased osmolar clearance resulted. Na-K-ATPase activities in both the cortex and inner medulla of the digoxin-infused kidney were reduced by half. However, Walser<sup>27</sup> has described certain diuretics which inhibit Na-K-ATPase *in vitro* but fail to do so *in vivo*, so the apparent discrepancy between the *in-vivo* and *in-vitro* actions of fluoride is not unique.

It is possible that increased medullary blood flow is the primary event responsible for reduced medullary sodium concentration. The possible causes of increased medullary blood flow are either direct or indirect. A direct effect of fluoride on the medullary vasculature is reasonable, since single, large doses of fluoride cause peripheral dilatation.<sup>28</sup> In general, renal cortical fluoride concentrations are higher than those of plasma by a factor of 3, while the inner medullary factors range from 4 to 7. Smith<sup>29</sup> has summarized data which show the

concentration of radioactive fluoride in the kidney to be 2½ to 4 times higher than that in skeletal muscle for as long as nine hours after dosing. Thus, direct vasodilatation localized in the kidney, especially the inner medulla, is possible.

A possible indirect mechanism could involve afferent-efferent shunting throughout the cortex. The effect of fluoride on glomerular filtration rate and the paucity of glomerular erythrocytes suggest afferent arteriolar constriction. The lack of a fluoride effect on hippuran clearance, indicating normal cortical blood flow rate, and the observation of increased numbers of erythrocytes in the vessels of the outer medulla suggest afferent-efferent shunting. Medullary blood flow would be expected to increase, since the pressure drop which normally occurs across the glomerular vascular tuft would be avoided.

Increased permeability to water of the ascending limbs of Henle's loops might explain such shunting. The resultant delivery of a more nearly isotonic fluid to the macula densa may be a critical factor in the control of glomerular filtration rate, as suggested by the juxtaglomerular apparatus feedback theory of renal autoregulation,<sup>20</sup> possibly by afferent-efferent shunting of blood. Increased permeability to water of the ascending limbs would also directly result in a diminished ability to concentrate sodium in the medulla. If increased permeability to water of the ascending limb is the basis of the fluoride-induced decrease in medullary sodium concentration, then the fluoride-intoxicated kidney would have difficulty forming hypotonic urine. Frascino's data<sup>14</sup> suggest dilution is not markedly affected, but neither blood nor renal fluoride concentration was reported, so the critical experiments remain to be done. Moreover, a direct effect of fluoride on the juxtaglomerular apparatus, resulting in afferent arteriolar constriction, cannot be excluded.

The decreases in osmolal clearance for the fluoride-infusion groups suggest that the decline in urinary osmolality was proportionately greater than the increases in urine-flow rate. Fluoride tends to decrease glomerular filtration rate. This reduction, accompanied by either no change or an increase in fractional solute reabsorption (table 6), can explain decreased osmolal clearances. Concurrent increases in

urine-flow rate result in decreased tubular free-water reabsorption. In addition, reduced medullary interstitial hypertonicity can account, at least in part, for both increased solute reabsorption and decreased water reabsorption, the former through a lower trans-tubular gradient for ion back-diffusion, and the latter through the reduction of transtubular osmotic gradients.

The increased water content of the kidney sections of the fluoride-infusion groups can be partly explained by increased distal tubule and collecting-duct volumes. An additional factor might be increased medullary blood flow, which case the countercurrent exchanger function of the vasa recta would be compromised and more water would be carried into the medulla.

After correction of renal-tissue potassium concentrations for increased water content, slight reduction persisted for the fluoride-infusion groups. The basis for this effect is unknown, but it is not peculiar to fluoride-infused diuretic rats, as did Atherton *et al.*<sup>21, 22</sup> Thus, decreased renal-tissue potassium concentration appears to be frequently associated with increased urine-flow rate in the rat.

There is a growing body of experimental evidence supporting the hypothesis that fluoride is the cause of post-methoxyflurane renal dysfunction. Our preliminary results with rats,<sup>12</sup> Frascino's results with hypopenic dogs,<sup>14</sup> the findings of Mazze *et al.* with rats receiving methoxyflurane or fluoride,<sup>15</sup> and the current results all point to a fluoride-induced concentrating defect which closely resembles that seen in post-methoxyflurane patients. The present experiments have examined renal changes associated with plasma fluoride concentrations of clinical importance and lead to the conclusion that the basis of the concentrating defect is a reduction in medullary solute concentration. The suggestion of reduced collecting-duct permeability to water as the cause<sup>14, 15</sup> does not seem likely. The reduction of medullary solute concentration is sufficient to account for the functional changes, while decreased collecting-duct permeability to water cannot explain the reduction in medullary solute concentration. Further experiments on the mechanism of the renal effects of fluoride should be directed toward changes in in-

trarenal hemodynamics, permeability to water, and sodium transport in the ascending limbs of Henle's loops, or altered function of the juxtaglomerular apparatus.

The authors gratefully acknowledge the assistance of Dr. B. W. Fry, Ms. J. S. Howe, and Mr. C. F. Ning, and Dr. D. H. Pashley's critical review of the manuscript. Dr. C. Yuile kindly made the histologic examinations.

### References

1. Muehlberger CW: Toxicity studies of fluoride insecticides. *J Pharmacol Exp Ther* 39:246-248, 1930
2. Taylor JM, Scott JK, Maynard EA, et al: Toxic effects of fluoride on the rat kidney. I. Acute injury from large doses. *Toxicol Appl Pharm* 3:278-289, 1961
3. Pindborg JJ: The effect of 0.05% dietary sodium fluoride on the rat kidney. *Acta Pharmacol Tox* 13:36-45, 1957
4. Bond AM, Murray MM: Kidney function and structure in chronic fluorosis. *Br J Exp Pathol* 33:168-176, 1952
5. Schwab H, Bauernfeind A, Hensel H: Die Wirkung von Natrium-fluorid auf die renale Ausscheidung von p-Aminohippursäure, Kreatinin, Chlorid, und Harnstoff beim Hund. *Naunyn Schmiedeberges Arch Pharmacol* 224:285-294, 1955
6. Gottlieb L, Grant SB: Diuretic action of sodium fluoride. *Proc Soc Exp Biol Med* 29:1293-1294, 1931
7. Goldemberg L: Tratamiento de la enfermedad de basedow y del hipertiroidismo por fluor. *Rev Soc Med Int Soc Tisiolog* 6:217-242, 1931
8. Yeh MC, Singer L, Armstrong WD: Roles of kidney and skeleton in regulation of body fluid fluoride concentration. *Proc Soc Exp Biol Med* 135:421-425, 1970
9. Taves DR, Fry BW, Freeman RB, et al: Toxicity following methoxyflurane anesthesia. II. Fluoride concentrations in nephrotoxicity. *JAMA* 214:91-95, 1970
10. Fry BW, Taves DR, Merin RC: Fluorometabolites of methoxyflurane: Serum concentrations and renal clearances. *ANESTHESIOLOGY* 38:38-44, 1973
11. Mazze RI, Trudell JR, Cousins MJ: Methoxyflurane metabolism and renal dysfunction: Clinical correlation in man. *ANESTHESIOLOGY* 35:247-252, 1971
12. Holaday DA, Rudofsky S, Treuhart PS: The metabolic degradation of methoxyflurane in man. *ANESTHESIOLOGY* 33:579-593, 1970
13. Whitford GM, Taves DR: Fluoride-induced diuresis: Plasma concentrations in the rat. *Proc Soc Exp Biol Med* 137:458-460, 1971
14. Frascino JA, O'Flaherty J, Ohno C, et al: Effect of inorganic fluoride on the renal concentrating mechanism. Possible nephrotoxicity in man. *J Lab Clin Med* 79:192-203, 1972
15. Mazze RI, Cousins MJ, Kosek JC: Dose-related methoxyflurane nephrotoxicity in rats: A biochemical and pathologic correlation. *ANESTHESIOLOGY* 36:571-587, 1972
16. Taves DR: Determination of submicromolar concentrations of fluoride in biological samples. *Talanta* 15:1015-1023, 1968
17. Marlow CC, Sheppard G: Labeled tracers of inulin for physiological measurements. *Clin Chim Acta* 28:469-478, 1970
18. Mazze RI, Shue GL, Jackson SH: Renal dysfunction associated with methoxyflurane anesthesia. A randomized, prospective clinical evaluation. *JAMA* 216:278-288, 1971
19. Merkle RB, McDonald FD, Waldman J, et al: Human renal function following methoxyflurane anesthesia. *JAMA* 218:841-844, 1971
20. Malvin RL, Wilde WS: Washout of renal countercurrent sodium gradient by osmotic diuresis. *Am J Physiol* 197:177-180, 1959
21. Atherton JC, Hai MA, Thomas S: Time course of change in renal tissue composition during mannitol diuresis in the rat. *J Physiol* 197:411-428, 1968
22. Atherton JC, Hai MA, Thomas S: Time course of change in renal tissue composition during water diuresis in the rat. *J Physiol* 197:429-443, 1968
23. Howards SS, Davis BB, Knox FG, et al: Depression of fractional sodium reabsorption by the proximal tubule of the dog without sodium diuresis. *J Clin Invest* 47:1561-1572, 1968
24. Leeber DA, Murdaugh HV, Davis BB: Inhibition of sodium transport by Henle's loop after intravenous saline infusion. *J Lab Clin Invest* 72:220-227, 1968
25. Yoshida H, Nagai M, Nakagawa U: Irreversible inactivation of (Na-K)-dependent ATPase and K-dependent phosphatase by fluoride. *Biochim Biophys Acta* 150:162-164, 1968
26. Martinez-Maldonado M, Allen JC, Eknayan G, et al: Renal concentrating mechanism: Possible role for Na-K activated ATPase. *Science* 165:807-808, 1969
27. Walser M: *In The Kidney: Morphology, Biochemistry, Physiology*. III. Edited by C Rouiller, AF Muller. New York, Academic Press, 1971, pp 165-166
28. Caruso FS, Maynard EA, DiStefano V: *In Handbook of Experimental Pharmacology. Pharmacology of Fluorides*. 20 (2). Edited by FA Smith. Berlin, Springer-Verlag, 1970, pp 144-165
29. Smith FA: *In Handbook of Experimental Pharmacology. Pharmacology of Fluorides*. 20 (1). Edited by FA Smith. Berlin, Springer-Verlag, 1966, pp 70-71
30. Thurau K, Levine DZ: *In The Kidney: Morphology, Biochemistry, Physiology*. III. Edited by C Rouiller, AF Muller. New York, Academic Press, 1971, pp 12-17
31. Heller J, Skrhova V, Vostal J: The effect of various diuretic agents on renal electrolyte and urea concentration gradients in rats. *Experientia* 21:454-457, 1965
